1 **Supply and consumption of glucose 6-phosphate in the chloroplast stroma**

2 Alyssa L. Preiser<sup>1,2</sup>, Aparajita Banerjee<sup>2</sup>, Nicholas Fisher<sup>1</sup>, Thomas D. Sharkey<sup>1,2,3</sup>

3 Running Title: **Supply and consumption of plastidic glucose 6-phosphate**

4

5 <sup>1</sup> MSU-DOE Plant Research Laboratory, 210 Wilson Road, Michigan State University, East  
6 Lansing, MI, USA 48824; <sup>2</sup> Department of Biochemistry and Molecular Biology, 603 Wilson  
7 Road, Michigan State University, East Lansing, MI, USA 48824; Plant Resilience Institute,  
8 Michigan State University, Plant Biology Laboratories, 612 Wilson Road, East Lansing, MI  
9 USA 48824

10

11 **Author for correspondence:**

12 *Thomas D. Sharkey*

13 *Tel: +1 (517) 353-4886*

14 *Email: [tsharkey@msu.edu](mailto:tsharkey@msu.edu)*

15

16 **Date of submission:** October 12, 2018

17 **Number of Tables:** 4

18 **Number of Figures:** 12 (Figs 6, 7, 11, and 12 in color) and 5 supplemental figures

19 **Word count:** 5,998

20 **Supply and consumption of glucose 6-phosphate in the chloroplast stroma**

21 Running Title: **Supply and consumption of plastidic glucose 6-phosphate**

22 **Highlight**

23 Glucose 6-phosphate stimulates glucose-6-phosphate dehydrogenase. This enzyme is less active  
24 during the day but retains significant activity that is very sensitive to the concentration of glucose  
25 6-phosphate.

26 **Abstract**

27 Fructose 6-phosphate is an intermediate in the Calvin-Benson cycle and can be acted on by  
28 phosphoglucoisomerase to make glucose 6-phosphate (G6P) for starch synthesis. A high  
29 concentration of G6P is favorable for starch synthesis but can also stimulate G6P dehydrogenase  
30 initiating the glucose-6-phosphate shunt an alternative pathway around the Calvin-Benson cycle.  
31 A low concentration of glucose 6-phosphate will limit this futile cycle. In order to understand the  
32 biochemical regulation of plastidic glucose 6-phosphate supply and consumption, we  
33 characterized biochemical parameters of two key enzymes, phosphoglucoisomerase (PGI) and  
34 G6P dehydrogenase (G6PDH). We have found that the plastidic PGI in has a higher  $K_m$  for G6P  
35 compared to that for fructose 6-phosphate. The  $K_m$  of G6PDH isoform 1 is increased under  
36 reducing conditions. The other two isoforms exhibit less redox regulation; isoform 2 is the most  
37 inhibited by NADPH. Our results support the conclusion that PGI restricts stromal G6P synthesis  
38 limiting futile cycling via G6PDH. It also acts like a one-way valve, allowing carbon to leave the  
39 Calvin-Benson cycle but not reenter. We found flexible redox regulation of G6PDH that could  
40 regulate the glucose-6-phosphate shunt.

41

42 **Keywords:** Calvin-Benson cycle, glucose-6-phosphate dehydrogenase, glucose 6-phosphate,  
43 glucose 6-phosphate shunt, hydrogen peroxide, phosphoglucoisomerase, redox regulation

44 **Abbreviations:**

|    |       |                                   |
|----|-------|-----------------------------------|
| 45 | 6PG   | 6-phosphogluconic acid            |
| 46 | At    | <i>Arabidopsis thaliana</i>       |
| 47 | DHAP  | dihydroxacetone phosphate         |
| 48 | E4P   | erythrose 4-phosphate             |
| 49 | F6P   | fructose 6-phosphate              |
| 50 | FBP   | fructose 1,6-bisphosphate         |
| 51 | G6P   | glucose 6-phosphate               |
| 52 | G6PDH | glucose-6-phosphate dehydrogenase |
| 53 | PGA   | 3-phosphoglyceric acid            |
| 54 | PGI   | phosphoglucoisomerase             |
| 55 | PGM   | phosphoglucomutase                |
| 56 | So    | <i>Spinacia oleracea</i>          |
| 57 | Xu5P  | xylulose 5-phosphate              |

## 58 **Introduction**

59 Glucose 6-phosphate (G6P) is the first product out of the Calvin-Benson cycle in the starch  
60 synthesis pathway. However, it can also enter the oxidative pentose phosphate pathway creating  
61 a G6P shunt that bypasses the nonoxidative branch of the pentose phosphate pathway reactions  
62 that make up a significant part of the Calvin-Benson cycle. This pathway is generally considered  
63 to occur only in the dark (Anderson *et al.*, 1974; Buchanan, 1980; Buchanan *et al.*, 2015; Heldt  
64 and Piechulla, 2005; Scheibe *et al.*, 1989). However, a high G6P concentration, favorable for  
65 starch synthesis, could cause the shunt to occur in the light. Generally, the G6P concentration in  
66 the plastid is low, much lower than its concentration in the cytosol (Gerhardt *et al.*, 1987;  
67 Sharkey and Vassey, 1989; Szecowka *et al.*, 2013) but under some conditions the plastid G6P  
68 concentration might increase depending on the production and consumption of plastid G6P.

69 Four different enzymes in the plastid can produce or consume G6P (Fig. 1). First, G6P can be  
70 produced by phosphoglucoisomerase (PGI). This enzyme reversibly isomerizes fructose 6-  
71 phosphate (F6P) and G6P. Analysis of mutant lines of *Clarkia xantiana* indicated that PGI is not  
72 in great excess (Kruckeberg *et al.*, 1989). There are two isoforms of PGI in Arabidopsis, one  
73 targeted to the plastid and the other found in the cytosol. The plastid PGI in particular is likely  
74 limiting given that G6P/F6P ratios in the plastid are significantly displaced from equilibrium and  
75 much lower than in the cytosol (Backhausen *et al.*, 1997; Gerhardt *et al.*, 1987; Schnarrenberger  
76 and Oeser, 1974; Sharkey and Vassey, 1989; Szecowka *et al.*, 2013). Plants with loss-of-function  
77 mutants in the plastidic enzyme have 98.5% less starch in leaves (Yu *et al.*, 2000). Loss-of-  
78 function mutants in the cytosolic enzyme results in increased starch and decreased sucrose (Kunz  
79 *et al.*, 2014).

80 The second enzyme affecting G6P in the chloroplast is phosphoglucomutase. This enzyme  
81 converts G6P to glucose 1-phosphate. This reaction is an important step in starch synthesis.  
82 Third, G6P can be transported across the chloroplast membrane by GPT2, a glucose-6-  
83 phosphate/phosphate antiporter in the chloroplast membrane. GPT2 is not normally present green  
84 tissue (Kammerer *et al.*, 1998; Kunz *et al.*, 2010) and this is corroborated by the large  
85 concentration gradient in G6P between the chloroplast and cytosol (Gerhardt *et al.*, 1987;  
86 Sharkey and Vassey, 1989; Szecowka *et al.*, 2013). However, GPT2 is important in acclimation  
87 to light (Dyson *et al.*, 2015) and is expressed in plants grown in high CO<sub>2</sub> (Leakey *et al.*, 2009)

88 and is increased when starch synthesis is repressed by knocking out starch synthesis genes (Kunz  
89 *et al.* 2010). When GPT2 is present, the gradient of G6P would result in G6P import into the  
90 plastid (Gerhardt *et al.*, 1987; Sharkey and Vassey, 1989; Szecowka *et al.*, 2013). Finally,  
91 glucose-6-phosphate dehydrogenase (G6PDH) can oxidize G6P to 6-phosphoglucan lactone, the  
92 first step in the oxidative branch of the pentose phosphate pathway. There are six isoforms of  
93 G6PDH in *Arabidopsis*. Four of these are predicted to be targeted to the chloroplast where three  
94 are functional (Meyer *et al.*, 2011; Wakao and Benning, 2005). It has been hypothesized that  
95 during the day, G6PDH initiates a G6P shunt around the Calvin-Benson cycle (Sharkey and  
96 Weise, 2016). The G6P shunt oxidizes and decarboxylates G6P to synthesize xylulose 5-  
97 phosphate (Xu5P). While the G6P shunt is a futile cycle, it has been proposed to play an  
98 important role in stabilization of photosynthesis.

99 Our goal is to understand the kinetic regulation of the stromal G6P pool, specifically its  
100 production by PGI and its consumption by G6PDH. We will not further investigate the roles of  
101 PGM and GPT2 since PGM has been characterized because of its key role in starch synthesis  
102 (Hattenbach and Heineke, 1999; Najjar, 1948; Ray and Roscelli, 1964), and GPT2 is usually not  
103 present in green photosynthetic tissue (Kammerer *et al.*, 1998; Kunz *et al.*, 2010). We repeated  
104 critical measurements of PGI kinetics and found that while the isomerization of F6P and G6P is  
105 reversible, PGI has a greater affinity for F6P than G6P. Novel findings describing the regulation  
106 of G6PDH indicate that G6PDH can remain fairly active during the day. We conclude that a G6P  
107 shunt is allowed and even likely in light of the kinetic parameters of G6PDH and that its activity  
108 could be modulated during the day to regulate flux through the G6P shunt.

## 109 **Materials and Methods**

### 110 **Overexpression and purification of recombinant enzymes**

111 His-tagged (N-terminal) *Arabidopsis thaliana* plastidic and cytosolic PGI, and C-terminal *Strep*-  
112 tagged (Wakao and Benning, 2005; Wendt *et al.*, 2000) plastidic G6PDH1, 2, and 3 genes were  
113 commercially synthesized by GenScript (<https://www.genscript.com>). All of the plasmid  
114 constructs were overexpressed in *E. coli* strain BL21. Cells were grown at 37°C to an OD<sub>600</sub> of  
115 0.6 to 1 and induced with 0.5 mM isopropyl β-D-1 thiogalactopyranoside at room temperature.  
116 Cells were centrifuged and resuspended in lysis buffer (5 ml lysis buffer/g of pellet; 50 mM  
117 sodium phosphate, pH 8.0, 300 mM NaCl) containing 1 mg ml<sup>-1</sup> lysozyme, 1 μg ml<sup>-1</sup> of DNaseI,

118 and 1x protease inhibitor cocktail (Sigma, [www.sigmaaldrich.com](http://www.sigmaaldrich.com)). Cells were then lysed by  
119 sonication (Branson Sonifier 250, [us.vwr.com](http://us.vwr.com)). The sonicator was set at 50% duty cycle and an  
120 output level of 1. The cells were sonicated using five steps where each step consisted of 15 s  
121 pulses and 15 s on ice. The lysate was centrifuged and supernatant collected. For plastidic and  
122 cytosolic PGI, Ni-NTA resin (Qiagen, <https://www.qiagen.com>) was added to the crude lysate  
123 with gentle stirring for 1 hr. The mixture was loaded onto a column and washed with wash buffer  
124 (50 mM sodium phosphate, pH 8.0, 300 mM NaCl, 10 mM imidazole) until the OD<sub>280</sub> of the  
125 effluent was less than 0.05. Protein was eluted with elution buffer (50 mM sodium phosphate pH  
126 8.0, 300 mM NaCl, 250 mM imidazole) containing 1x protease inhibitor cocktail. The Ni-NTA  
127 column purification was performed in a cold room at 4°C. For G6PDH1, 2, and 3, harvested  
128 proteins were resuspended in cold Buffer W (IBA, [www.iba-lifesciences.com](http://www.iba-lifesciences.com)) with protease  
129 inhibitor cocktail, 1 mg ml<sup>-1</sup> lysozyme, and 2.73 kU DNaseI and lysed as described above.  
130 Protein was purified on a *Strep*-Tactin column (IBA) following the manufacturer's instructions.  
131 For all purified proteins, SDS-PAGE was carried out and fractions containing >95% of total  
132 protein of interest were combined and concentrated using Amicon Ultra 0.5 ml centrifugal filters  
133 (molecular weight cut off 3 kDa). Glycerol was added to the concentrated protein to obtain a  
134 final protein solution with 15% glycerol. The glycerol stock of the proteins was aliquoted into  
135 small volumes, frozen in liquid nitrogen, and stored at -80°C. The concentration of the proteins  
136 was determined using Pierce 660 nm protein assay reagent kit (ThermoFisher Scientific,  
137 [www.thermofisher.com](http://www.thermofisher.com)) using a bovine serum albumin standard. Final preparations of purified  
138 protein were run on an SDS-polyacrylamide gel and stained with Coomassie Blue to check the  
139 purity of the enzymes. Molecular weights were estimated from the protein construct using Vector  
140 NTI (ThermoFisher Scientific, [www.thermofisher.com](http://www.thermofisher.com)).

#### 141 **Coupled spectrophotometric assay for PGI (F6P to G6P reaction) and G6PDH**

142 The activity of the purified plastidic and cytosolic PGI and G6PDH1, 2, and 3 was studied using  
143 coupled spectrophotometric assays. Concentrations of G6P and F6P were determined using  
144 NADPH-linked assays measured spectrophotometrically. All assays were validated by  
145 demonstrating linear product formation, proportional to the time of the assay and amount of  
146 enzyme added. All coupling enzymes were added in excess so that no change in product  
147 formation was seen when varying the coupling enzyme. PGI assays were done in 50 mM bicine  
148 buffer pH 7.8, containing 4.8 mM DTT, 0.6 mM NADP<sup>+</sup>, 2 U G6PDH (from *Leuconostoc*

149 *mesenteroides*), varying concentrations of F6P, and 1.31 ng plastidic or cytosolic PGI. The  
150 concentrations used to study the  $K_m$  of G6PDH for F6P were 0-4.8 mM. For G6PDH assays, the  
151 assay was done in 150 mM Hepes buffer pH 7.2 containing varying concentrations of  $\text{NADP}^+$ ,  
152 varying concentrations of G6P, and G6PDH. 8.3 ng of G6PDH1, 20 ng of G6PDH2, and 44 ng  
153 of G6PDH3 were used. The concentrations used to study the  $K_m$  of G6PDH for G6P were 0 –  
154 44.2 mM, and the concentrations used to study  $K_m$  for  $\text{NADP}^+$  were 0 – 11  $\mu\text{M}$ . When G6PDH  
155 was assayed varying G6P, 0.6 mM  $\text{NADP}^+$  was added. When G6PDH was assayed varying  
156  $\text{NADP}^+$ , 7.6 mM G6P was added for G6PDH1 and 3 and 15.4 mM for G6PDH2. Under these  
157 conditions, less than 5% of the non-limiting substrate was consumed over the duration of the  
158 assay. The assay mixtures were prepared by adding all the components except the enzyme.  
159 Activity was recorded with a dual wavelength filter photometer (Sigma ZFP2) as the change in  
160 absorbance at 334 – 405 nm caused by  $\text{NADP}^+$  reduction to NADPH using an extinction  
161 coefficient of  $6190 \text{ M}^{-1} \text{ cm}^{-1}$ . These wavelengths were used because they correspond to mercury  
162 lamp emission wavelengths of the lamp used in the filter photometer. When assaying redox  
163 sensitivity, G6PDH was incubated with 10 mM DTT or hydrogen peroxide at room temperature  
164 before addition to the assay. The G6P concentration was 0.3 mM. For G6P protection assays,  
165 G6PDH1 was assayed at 5 mM G6P. After getting a stable baseline with G6PDH and  $\text{NADP}^+$ ,  
166 the reaction was initiated by addition of G6P and incubated at room temperature. Activity was  
167 measured 30 or 60 minutes later to allow time for DTT deactivation. Less than 5% of added G6P  
168 and  $\text{NADP}^+$  (non-limiting substrate) was consumed within 60 minutes.

#### 169 **Mass spectrometry assay for PGI (G6P to F6P reaction)**

170 The activity of the purified plastidic and cytosolic PGI in the G6P to F6P direction was studied  
171 using a coupled mass spectrometer assay. The assay mixture contained 50 mM Tris pH 7.8, 2.5  
172 mM  $\text{MgCl}_2$ , 1 mM ATP, 5 mM DTT, 0.15 U phosphofruktokinase (from *Bacillus*  
173 *stearothermophilus*), varying concentrations of G6P, and 1.6 ng of plastidic or cytosolic PGI.  
174 The assay mixtures were prepared by adding all the components except the enzyme. The reaction  
175 was initiated with the enzyme. After five min, the reaction was quenched with four volumes of  
176 100% ice-cold methanol. Production of FBP was shown to be linear for up to ten min. Five nmol  
177 of D-[UL- $^{13}\text{C}_6$ ] fructose 1,6-bisphosphate was added as an internal standard for quantification,  
178 and the sample was heated for 5 minutes at 95°C. Six volumes of 10 mM tributylamine, pH 5.0,  
179 was added and the sample was filtered through a Mini-UniPrep 0.2  $\mu\text{m}$  Syringeless Filter Device



180 (GE Healthcare Life Sciences, Whatman). LC/MS-MS was carried out on a Waters Quattro  
181 Premier system and was operated in electrospray negative ion mode with both multiple and  
182 selected reaction monitoring. The capillary voltage was 2.75 kV; the cone voltage, 50 V; the  
183 extractor voltage, 5 V. The source temperature was 120°C and the desolvation temperature was  
184 350°C. Gas flow for the desolvation and cone was set to 800 and 50 l hr<sup>-1</sup>, respectively. The  
185 syringe pump flow was 10 µl min<sup>-1</sup>. MassLynx software and the Acquity UPLC Console were  
186 used to control the instrument. Samples were passed through an Acquity UPLC BEH Column  
187 (Waters) with a multi-step gradient with eluent A (10 mM tributylamine, adjusted to pH 6 with  
188 500 mM acetic acid) and eluent B (methanol): 0-1 min, 95-85% A; 1-3 min, 85%-65% A; 3-3.5  
189 min, 65-40% A; 3.5-4 min, 40-0% A; 4-8.50 min, 0% A; 8.5-10 min, 100% A. The flow rate was  
190 0.3 ml min<sup>-1</sup>. FBP peaks were integrated using MassLynx software and the concentration of the  
191 metabolites was quantified by comparing the peak response to a calibration curve.

## 192 **Kinetic characterization**

193 Enzymes were assayed at varying concentrations of substrate while keeping the concentration of  
194 other substrates (if applicable) constant as described above. The  $K_m$  values for plastidic and  
195 cytosolic PGI were determined by fitting the data with non-linear regression using the Hill  
196 function in OriginPro 8.0 (OriginLab Corporation). All G6PDH isoforms showed substrate  
197 inhibition, therefore we estimated regression lines and kinetic constants by finding the minimum  
198 of the sum of the squared residuals from the following equation using Solver in Excel, where  $v$  is  
199 the specific activity of the enzyme in µmol mg<sup>-1</sup> min<sup>-1</sup> (Gray *et al.*, 2011):

$$200 \quad v = \frac{v_{max} + v_i \left( \frac{S^x}{K_{is}^x} \right)}{1 + \frac{K_m^H}{S^H} + \frac{S^x}{K_{is}^x}} \quad \text{Eq. 2}$$

## 201 **Inhibition studies**

202 Different metabolites of the Calvin-Benson cycle were tested for their effect on both PGI and  
203 G6PDH activity. All the metabolites were purchased from Sigma Aldrich. In metabolite  
204 screening assays, metabolites were assayed at a 1:1 ratio with the substrate. To determine the  $K_i$   
205 of G6PDH or PGI for different metabolites, the assay was carried out in presence of various  
206 concentrations of F6P or G6P and other metabolites. Assay mixtures were prepared as described  
207 above with different concentrations of substrate. For PGI studies, 0-0.98 mM F6P or 0-1.5 mM



208 G6P was used and 0-3.8 mM G6P was used for G6PDH studies. The concentration of NADP<sup>+</sup> in  
209 G6PDH assays was held constant at 600 μM. The concentration range used to study the  $K_i$  of  
210 PGI for E4P were 0-0.05 mM and that for 6PG were 0-1.5 mM. For G6PDH1 and 3 assays 0-0.3  
211 mM NADPH was used and 0-14.5 μM NADPH was used for the G6PDH2 assays. The  
212 mechanism of inhibition was determined from Hanes-Woolf plots. The  $K_i$  was determined from  
213 the non-linear least squares fitting of the activity vs. F6P concentration plot using Solver in Excel  
214 using the standard equation for competitive inhibition as described below.

$$215 \quad v = \frac{V_{max} * S}{K_m \left(1 + \frac{I}{K_i}\right) + S} \quad \text{Eq. 3}$$

216 where  $V_{max}$  is the maximum velocity,  $S$  is the F6P concentration,  $K_m$  is the Michaelis constant,  
217 and  $K_i$  is the inhibition constant. For non-competitive inhibition, the below equation was used.

$$218 \quad v = \frac{V_{max} * S / \left(1 + \frac{I}{K_i}\right)}{\left(K_m \left(1 + \frac{I}{K_i}\right) / \left(1 + \frac{I}{K_i}\right) + S\right)} \quad \text{Eq. 4}$$

### 219 **Midpoint potential of G6PDH1**

220 A series of oxidation-reduction titrations was done with purified G6PDH1. Fully reduced DTT  
221 was prepared daily by combining 100 mM DTT with 200 mM sodium borohydride. The mixture  
222 was incubated on ice for 20 minutes and then neutralized by adding concentrated HCl to a final  
223 concentration of 0.2 M. The mixture was brought to a pH of 8 and diluted to a final concentration  
224 of 50 mM DTT. Oxidized DTT and buffers used in the assay were also pH 8. We used mixtures  
225 of oxidized and reduced DTT at different redox potentials, ranging from -420 to -124 mV. The  
226 total concentration of DTT was 1-8.5 mM. 4.1 ng of G6PDH1 was incubated in the DTT mixture  
227 and 1 mg/ml BSA, pH 8 for 1 hr at 25°C in an anaerobic environment. Activity of G6PDH was  
228 measured as described in 'Chloroplast isolation' with 0.3 mM G6P. The data were fit to the  
229 Nernst equation for a two-electron process. We used the  $E_m$  of DTT as determined by Hutchison  
230 and Ort (1995), -391 mV at pH 8. Oxidized and reduced DTT was quantified using modified  
231 protocols from Cho *et al.* (2005) and Charrier and Anastasio (2013) to calculate the potential.

$$232 \quad E_h = E_m + 2.303 \left(\frac{RT}{nF}\right) * \log_{10} \left(\frac{DTT_{ox}}{DTT_{red}}\right) \quad \text{Eq. 5}$$

### 233 **Leaf extract assays**

234 Wild type *Arabidopsis* was grown in a 12 hr photoperiod at  $120 \mu\text{mol m}^{-2} \text{s}^{-1}$  of light. Day  
235 temperature was  $23^{\circ}\text{C}$  and night temperature was  $21^{\circ}\text{C}$ . Approximately 300 mg of leaf samples  
236 were collected in a 2 ml microfuge tube and immediately frozen by plunging in liquid nitrogen.  
237 Samples were ground in a Retsch mill with 4 mm silicone carbide particles (BioSpec Products,  
238 [www.biospec.com](http://www.biospec.com)). One ml of extraction buffer (45 mM Hepes, pH 7.2, 30 mM NaCl, 10 mM  
239 mannitol, 2 mM EDTA, 0.5% Triton-X-100, 1% polyvinylpyrrolidone, 0.5% casein, 1%  
240 protease inhibitor cocktail) was added to the sample and vortexed for 30 s. The sample was  
241 centrifuged for 30 s at maximum speed and immediately placed on ice. G6PDH activity was  
242 assayed as described in “Coupled spectrophotometric assay for phosphoglucosomerase (F6P to  
243 G6P reaction) and G6PDH”. Assays that used leaf extracts were normalized by mg of  
244 chlorophyll added to the assay mixture.

#### 245 **Chloroplast isolation**

246 Fresh spinach was purchased at a local market for use that day. Spinach was either dark or light  
247 treated for 1.5 hours before beginning isolation and petioles were kept in water to prevent  
248 wilting. *Arabidopsis* Col-0 was grown on soil in a growth chamber at a 12 h light at  $120 \mu\text{mol m}^{-2}$   
249  $\text{s}^{-1}$ ,  $23^{\circ}\text{C}$  and 12 h dark at  $21^{\circ}\text{C}$ . Plants were harvested either midday for light samples or  
250 midnight for dark samples.

251 Chloroplasts were isolated using a Percoll gradient (Weise *et al.*, 2004). Leaves were placed in a  
252 chilled blender with grinding buffer (330 mM mannitol, 50 mM Hepes, pH 7.6, 5 mM  $\text{MgCl}_2$ , 1  
253 mM  $\text{MnCl}_2$ , 1 mM EDTA, 5 mM ascorbic acid, 0.25% BSA), blended, and then filtered through  
254 four layers of cheese cloth. Filtered liquid was centrifuged and the pellet was resuspended in  
255 resuspension buffer (330 mM mannitol, 50 mM Hepes, pH 7.6, 5 mM  $\text{MgCl}_2$ , 1mM  $\text{MnCl}_2$ ,  
256 1mM EDTA, 0.25% BSA). The resuspended pellet was layered on top of a 20-80% Percoll  
257 gradient which was centrifuged at 1200 g for 7 min. The bottom band in the gradient containing  
258 the intact chloroplasts was collected. One volume of resuspension buffer was added to collected  
259 chloroplasts and centrifuged at 1200 g for 2 min. The pellet was resuspended in 50  $\mu\text{l}$  of water  
260 and vortexed to lyse the chloroplasts. One volume of 2x buffer (100 mM Hepes, pH 7.6, 10 mM  
261  $\text{MgCl}_2$ , 2 mM  $\text{MnCl}_2$ , 2 mM EDTA, 2 mM EGTA, 60% glycerol, 0.2% Triton X-100, 0.2%  
262 PVPP) was added. Samples were stored at  $-80^{\circ}\text{C}$  until used for further analysis. Chlorophyll was  
263 quantified by lysing 50  $\mu\text{l}$  of purified chloroplasts by sonication and adding supernatant to 1 ml

264 of 95% ethanol.  $OD_{654}$  was used to calculate the chlorophyll concentration (Wintermans and  
265 DeMots, 1965):

$$266 \quad \text{mg Chl} = OD * 0.0398 * 0.050 \mu\text{l} \quad \text{Eq. 1}$$

267 When chloroplast isolations were used to assess activity of fully oxidized and reduced plastidic  
268 G6PDH, oxidized or reduced DTT was added at a concentration of 10 mM to each solution used  
269 in the isolation. Assays that used isolated chloroplasts were normalized by mg of chlorophyll  
270 added to the assay mixture.

271

## 272 **Results**

### 273 **Purification of recombinant PGI and G6PDH**

274 Final concentration of purified plastidic AtPGI was 15.3 mg/ml and that of cytosolic AtPGI was  
275 13.8 mg/ml (Supplemental Fig. S1). The molecular weight of His-tagged recombinant plastidic  
276 and cytosolic AtPGI were ~62.9 kDa and ~62.5 kDa respectively. The specific activity was 787  
277  $\mu\text{mol mg}^{-1} \text{ protein min}^{-1}$  for plastidic AtPGI and 1522  $\mu\text{mol mg}^{-1} \text{ protein min}^{-1}$  for cytosolic  
278 AtPGI. The final concentration of AtG6PDH1 was 1.66 mg/ml, AtG6PDH2 was 1.90 mg/ml, and  
279 AtG6PDH3 was 0.177 mg/ml (Supplemental Fig. S1). The molecular weight of Strep-tagged  
280 recombinant AtG6PDH1 was ~65.2 kDa, AtG6PDH2 was ~70.2 kDa, and AtG6PDH3 was 70.5  
281 kDa. The maximum specific activity was 28.0  $\mu\text{mol mg}^{-1} \text{ protein min}^{-1}$  for AtG6PDH1, 18.7  
282  $\mu\text{mol mg}^{-1} \text{ protein min}^{-1}$  for AtG6PDH2, and 7.1  $\mu\text{mol mg}^{-1} \text{ protein min}^{-1}$  for AtG6PDH3.

### 283 **Kinetic characterization of plastidic and cytosolic PGI**

284 Table 1 shows the  $K_m$  (for both F6P and G6P) of plastidic and cytosolic AtPGI (Supplemental  
285 Fig. S2). For plastidic AtPGI, the  $K_m$  value for G6P was ~2.9-fold higher than that for F6P. The  
286  $K_m$ 's for F6P and G6P of the cytosolic enzyme were the same. DTT did not significantly  
287 influence the specific activity of plastidic or cytosolic PGI (Supplemental Fig. S3).

### 288 **E4P and 6PG inhibition of PGI**

289 We tested different metabolites for their effect on PGI activity. Inhibition with either limiting  
290 F6P or G6P was similar for both plastidic and cytosolic AtPGI. Erythrose 4-phosphate (E4P), 3-  
291 phosphoglyceric acid (PGA), dihydroxacetone phosphate (DHAP), and 6-phosphogluconic acid

292 (6PG) were screened (Fig. 2). Only E4P and 6PG showed significant inhibition. Inhibitory  
293 effects were not different between plastidic and cytosolic AtPGI. Fig. 3 shows the activity of  
294 plastidic AtPGI over a range of F6P and E4P concentrations. Activity of cytosolic AtPGI was  
295 analyzed in a similar manner as shown for plastidic AtPGI (Supplemental Fig. S4). The  
296 calculated  $K_i$  values of E4P and 6PG are shown in Table 1. The  $K_i$  values for 6PG were between  
297 31-203  $\mu\text{M}$ , depending on the isoform and substrate. E4P was shown to be more inhibitory with  
298  $K_i$ 's between 1.5- 6  $\mu\text{M}$ . Based on the Hanes-Woolf plots (Supplemental Fig. S5), E4P was  
299 shown to be competitive, except above 0.04 mM, with G6P. 6PG was identified as competitive  
300 with F6P, except above 1.0 mM, and non-competitive with G6P.

### 301 **Regulation of PGI in isolated chloroplasts**

302 Plastidic SoPGI activity from chloroplasts from dark-treated spinach leaves had a higher  $K_m$  for  
303 G6P compared to light-treated chloroplasts (Fig. 4). The  $K_m$  of SoPGI for F6P did not change in  
304 the light or dark.

### 305 **Kinetic characterization of G6PDH**

306 All three AtG6PDH isoforms showed substrate inhibition (Fig. 5a). The AtG6PDH  $K_m$  for G6P  
307 for isoforms 1 and 3 was 0.3 mM, while the  $K_m$  for isoform 2 was approximately 34-fold higher  
308 (10.3 mM). Table 2 shows the  $K_m$  (for both G6P and  $\text{NADP}^+$ ),  $k_{\text{cat}}$ , and G6P  $K_i$  of all three  
309 AtG6PDH isoforms. The catalytic efficiency of AtG6PDH1 for G6P was  $190 \text{ mM}^{-1} \text{ s}^{-1}$ , of  
310 AtG6PDH2 was  $3.8 \text{ mM}^{-1} \text{ s}^{-1}$ , and of AtG6PDH3 was  $48.7 \text{ mM}^{-1} \text{ s}^{-1}$ . For  $\text{NADP}^+$ , the catalytic  
311 efficiency of AtG6PDH1 was  $81.4 \text{ mM}^{-1} \text{ s}^{-1}$ , of AtG6PDH2 was  $30.3 \text{ mM}^{-1} \text{ s}^{-1}$ , and of  
312 AtG6PDH3 was  $29.2 \text{ mM}^{-1} \text{ s}^{-1}$ .

### 313 **Identification and characterization of inhibitors**

314 We tested ribulose 1,5-bisphosphate (RuBP), ribulose 5-phosphate (Ru5P), F6P, PGA, DHAP,  
315 E4P, NADPH, and 6PG for their effect on G6PDH activity. Only NADPH showed inhibition.  
316 While NADPH inhibited all three isoforms, AtG6PDH2 was the most inhibited. The calculated  
317  $K_i$  values of NADPH are shown in Table 2. NADPH was found to be competitive for all  
318 isoforms based on the Hanes-Woolf plots, except above 14.5  $\mu\text{M}$  for G6PDH2 and above 0.15  
319 mM for G6PDH3 (Supplemental Fig. S5).

### 320 **Redox regulation**

321 All isoforms of AtG6PDH were susceptible to deactivation by DTT, but AtG6PDH1 was the  
322 most deactivated after two hours, losing approximately 90% of its activity (Fig. 6a). Kinetic  
323 characterization of AtG6PDH1 incubated with 10 mM DTT showed that decreased activity in  
324 AtG6PDH1 was due to both a decrease in  $k_{cat}$  and an increase in  $K_m$  and occurred over  
325 approximately 45 minutes (Fig. 6b). However, the  $k_{cat}$  was less affected than the  $K_m$  (Table 3).  
326 Comparison of our results to those of Née *et al.* (2009), who used thioredoxins to deactivate  
327 AtG6PDH1, show that DTT is an acceptable mimic of thioredoxins to deactivate AtG6PDH1.  
328 Both results show that AtG6PDH1 will lose ~90% of activity when fully reduced. AtG6PDH2  
329 and 3 showed a decrease in  $k_{cat}$ , but not an increase in  $K_m$ . AtG6PDH2 retained ~60% of activity  
330 and AtG6PDH3 retained ~80% of activity. Redox deactivation of AtG6PDH can be rescued by  
331 addition of hydrogen peroxide equimolar to DTT *in vitro* (Fig. 7a). AtG6PDH1 activity reached  
332 approximately 64% activity while 79% of the DTT was still reduced (Fig. 7b). The calculated  $E_m$   
333 at this time point was -407 mV. Based on our determined midpoint potential of AtG6PDH1 (see  
334 Midpoint potential of G6PDH1), we predict AtG6PDH1 would have < 5% activity at the redox  
335 potential of the DTT. Therefore, we conclude the addition of hydrogen peroxide did not result in  
336 the re-activation of G6PDH1 by oxidizing DTT but that hydrogen peroxide was directly  
337 activating G6PDH1. Redox deactivation of G6PDH1 was decreased when G6P was present.  
338 When G6P was present at  $K_m$  concentration during incubation with DTT, the activity of reduced  
339 AtG6PDH was higher than when G6P was not present (Fig. 8).

#### 340 **Midpoint potential of G6PDH1**

341 We determined the activity of AtG6PDH1 in a series of oxidation-reduction potentials (Fig. 9).  
342 The data was fit with the Nernst equation for a two-electron process. Incubation of AtG6PDH1 at  
343 higher redox potentials (-300 to -140 mV) did not increase activity any further. The midpoint  
344 potential of G6PDH1 at pH 8 was -378 mV. This corresponds to a midpoint potential of -318 mV  
345 at pH 7.

#### 346 **Activity of G6PDH in isolated chloroplasts and leaf extracts**

347 We used rapid leaf extract assays and chloroplast isolations to determine the activity of redox-  
348 regulated SoG6PDH and AtG6PDH compared to total activity in the plastid and the whole leaf.  
349 After illumination at  $500 \mu\text{mol m}^{-2} \text{s}^{-1}$  for one hr, G6PDH activity spinach leaf extracts decreased  
350 by about 35% (Fig. 10a). We also isolated chloroplasts in fully oxidizing or fully reducing

351 conditions. Fully reduced chloroplast activity was about 50% of fully oxidized chloroplast  
352 activity in both spinach and *Arabidopsis* (Fig. 10b).

## 353 **Discussion**

### 354 **Regulation of production of G6P**

355 High concentration of G6P in the chloroplast has been proposed to cause a G6P shunt (Fig. 12).  
356 The results of this study of key enzymes regulating the stromal G6P concentration support the  
357 hypothesis of the G6P shunt.

### 358 **PGI**

359 We propose that PGI is a key regulatory point in carbon export from the Calvin-Benson cycle.  
360 PGI acts as a one-way valve, going from F6P to G6P. The G6P/F6P ratio at equilibrium has been  
361 reported to vary from 3.70 at 10°C to 2.82 at 40°C (Dyson and Noltmann, 1968). However, *in*  
362 *vivo* measurements show the ratio of G6P/F6P in the stroma to be close to 1 (Backhausen *et al.*,  
363 1997; Gerhardt *et al.*, 1987; Schnarrenberger and Oeser, 1974; Sharkey and Vassey, 1989;  
364 Szecowka *et al.*, 2013). This disequilibrium is not seen for the cytosolic PGI where G6P/F6P  
365 ratios are 2.4-4.7 (Gerhardt *et al.*, 1987; Sharkey and Vassey, 1989; Szecowka *et al.*, 2013).  
366 Kinetic hydrogen isotope effects in starch, but not sucrose, also support the conclusion that  
367 plastidic PGI, but not cytosolic PGI, has insufficient activity to maintain equilibrium (Schleucher  
368 *et al.*, 1999). The high  $K_m$  for G6P for the plastidic enzyme makes this reaction functionally  
369 irreversible, helping to explain the kinetic isotope effects only seen in starch. The difference in  
370  $K_m$  is seen in both recombinant plastidic *Arabidopsis* PGI and in isolated plastidic spinach PGI.  
371 We previously assumed that PGA is a strong inhibitor of PGI (eg Sharkey and Weise 2016)  
372 based on the report by Dietz (1985). Surprisingly, we did not observe this to be the case.  
373 Examination of data from Dietz (1985) shows that during PGA inhibition assays, 6PG was also  
374 present in the reaction mixture at 50  $\mu$ M. The G6P/F6P disequilibrium in chloroplasts was  
375 proportional to PGA (Dietz, 1985)(see his Table I) but PGA was not tested alone for its effect on  
376 PGI. We found that the  $K_i$  of plastidic PGI for 6PG with limiting F6P was 31  $\mu$ M or with limiting  
377 G6P was 203  $\mu$ M. Based on our findings, we propose that PGI is not inhibited by PGA, and the  
378 previously seen inhibition can be explained by presence of 6PG or E4P. *In vivo* plastidic

379 concentrations of 6PG are not known, therefore, extent of inhibition of PGI *in vivo* by 6PG  
380 cannot be currently determined.

381 PGI is inhibited by  $\mu\text{M}$  concentrations of E4P (Backhausen *et al.*, 1997; Grazi *et al.*, 1960; Salas  
382 *et al.*, 1964). E4P may be inhibitory to both isoforms of PGI because it is a competitive inhibitor  
383 and the active sites of both isoforms may be similar (Backhausen *et al.*, 1997). Presumably there  
384 is no E4P in the cytosol since it lacks crucial enzymes in the non-oxidative branch of the pentose  
385 phosphate pathway (Schnarrenberger *et al.*, 1995). Measurements and estimations of plastidic  
386 E4P concentrations *in vivo* show E4P to be  $\sim 17\text{-}20 \mu\text{M}$  (Backhausen *et al.*, 1997; Bassham and  
387 Krause, 1969; Heldt *et al.*, 1977). This is well above the  $K_i$  of E4P for plastidic PGI. Backhausen  
388 *et al.* (1997) propose that this regulation is necessary in order to keep photosynthetic pool sizes  
389 stable during changes in light intensity.

390 In addition to stabilizing the Calvin-Benson cycle, we propose that inhibition of PGI by E4P can  
391 provide insight into the phenomenon of reverse sensitivity to  $\text{CO}_2$  and  $\text{O}_2$  of photosynthetic  $\text{CO}_2$   
392 assimilation rate observed by Sharkey and Vassey (1989). They found that when potato leaves  
393 were switched to decreased partial pressure of oxygen, rates of photosynthetic  $\text{CO}_2$  assimilation  
394 decreased as a result of decreased starch synthesis. Sharkey and Vassey (1989) proposed this was  
395 an effect of PGA inhibition of PGI, but because we did not find PGA to be inhibitory, we now  
396 suggest that the decrease in starch synthesis is due to an increase in E4P concentrations (or  
397 possibly 6PG).

398 We conclude that PGI is an important regulatory enzyme in central carbon metabolism, keeping  
399 G6P concentration lower than would be present at equilibrium thereby regulating the rate of the  
400 G6P shunt but also starch synthesis. Overexpression of phosphoglucomutase significantly  
401 increased starch synthesis confirming that starch synthesis is regulated at PGI in addition to the  
402 well-known regulation at ADPglucose pyrophosphorylase (Uematsu *et al.*, 2012).

#### 403 **GPT2**

404 If GPT2 is present it can import G6P from the cytosol to the chloroplast. Niewiadomski *et al.*  
405 (2005) showed that GPT2 could restore starch accumulation to plants lacking PGI. Expression of  
406 GPT2 is present in leaves when starch synthesis is blocked by loss of starch synthesis enzymes,  
407 when plants are grown in high  $\text{CO}_2$ , or exposed to an increase in light intensity (Dyson *et al.*,  
408 2015; Kunz *et al.*, 2010; Leakey *et al.*, 2009). It also is expressed in CAM plants, which require



409 high rates of starch synthesis (Cushman *et al.*, 2008; Neuhaus and Schulte, 1996). Thus, we  
410 believe that much of the time plants rely on PGI alone to supply G6P for starch synthesis and  
411 regulate PGI to regulate the supply of G6P to control the rate of the shunt. When higher rates of  
412 starch synthesis are needed GPT2 is expressed, increasing the supply of G6P (Fig. 11) but  
413 making the plant vulnerable to high rates of the G6P shunt.

#### 414 **Regulation of consumption of G6P by G6PDH**

415 Stromal G6P is primarily thought of as an intermediate in starch synthesis. It is converted by  
416 phosphoglucomutase to glucose 1-phosphate. However, there are additional reactions involving  
417 stromal G6P can participate in in the plastid. Here, we investigated consumption of G6P by  
418 G6PDH. G6PDH is competitively inhibited by its product NADPH and redox regulation that  
419 results mostly in an increase in  $K_m$ , which reduces futile cycling in leaves in the light (Scheibe *et al.*,  
420 1989; Wakao and Benning, 2005). However, while the enzyme is less active in the light  
421 (Anderson *et al.*, 1974; Buchanan, 1980; Buchanan *et al.*, 2015; Heldt and Piechulla, 2005;  
422 Scheibe *et al.*, 1989) our results show that it retains significant activity. Two factors that will  
423 modulate G6PDH activity in the light are the sensitivity of G6PDH to G6P and the redox  
424 regulation of G6P.

#### 425 **Sensitivity to G6P**

426 The activity of G6PDH (and thus the G6P shunt) is sensitive to stromal G6P concentration by  
427 three mechanisms.

- 428 • Deactivation of G6PDH in reducing conditions is primarily due to an increase in  $K_m$   
429 (Scheibe *et al.*, 1989, Fig 6).
- 430 • G6P protects G6PDH from deactivation in reducing conditions (Fig 8).
- 431 • G6P has been shown to relieve the inhibition of G6PDH by NADPH, as well as decrease  
432 the  $K_m$  and increases the  $k_{cat}$  of G6PDH in assays where NADP is varied (Olavarría *et al.*,  
433 2012; Shreve and Levy, 1980).

434 In conditions where G6P concentrations in the stroma may increase, such as those discussed  
435 above in “Production of G6P”, flux through G6PDH (and the G6P shunt) would also increase.

#### 436 **Redox Regulation**

437 We have determined the midpoint potential of G6PDH to be -378 mV at pH 8. This agrees with  
438 results from Née *et al.* (2009) and is close to the midpoint potential of other redox regulated  
439 enzymes in the Calvin-Benson cycle and electron transport (Cammack *et al.*, 1977; Hirasawa *et*  
440 *al.*, 1998; Hirasawa *et al.*, 2000; Hirasawa *et al.*, 1999; Knaff, 2000; Née *et al.*, 2009; Strand *et*  
441 *al.*, 2016). Assuming equilibrium and the midpoint potential of G6PDH1 at pH 8 as a reference,  
442 using the Nernst equation, we calculate that all Calvin-Benson enzymes and electron transport  
443 proteins are almost fully reduced and thus active while G6PDH maintains 50% of its activity  
444 (Table 4). Exceptions are ferredoxin and malate dehydrogenase (MDH), which are predicted to  
445 be oxidized at -378 mV. Although there may be deviations from redox equilibrium within the  
446 stroma, from these approximations we conclude that the midpoint potential of AtG6PDH1 is in a  
447 range to allow dynamic regulation of G6PDH and that it is theoretically possible to have flux  
448 through the Calvin-Benson cycle and the G6P shunt at the same time.

449 We have also shown that G6PDH can be activated upon addition of hydrogen peroxide. Brennan  
450 and Anderson (1980) and Née *et al.* (2009) previously demonstrated a role for hydrogen  
451 peroxide regulation of G6PDH both *in vivo* and *in vitro* in the presence of thioredoxin. In  
452 conditions where hydrogen peroxide can accumulate, such as high light, G6PDH deactivation  
453 could be reversed to modulate the consumption of G6P by the G6P shunt. The activity of  
454 G6PDH can be modulated by redox status of the plastid, G6P concentration, and hydrogen  
455 peroxide.

456 Redox regulation of dominant isoforms of G6PDH is found in many species, including  
457 Arabidopsis, pea, potato, spinach, and barley (Scheibe *et al.*, 1989; Schnarrenberger *et al.*, 1973;  
458 Semenikhina *et al.*, 1999; Wenderoth *et al.*, 1997; Wendt *et al.*, 2000; Wright *et al.*, 1997). We  
459 have shown that plastidic G6PDH from isolated Arabidopsis chloroplasts retains approximately  
460 50% of its total activity, even in high light conditions. Additionally, cytosolic G6PDH is not  
461 redox regulated and makes up 33% of whole leaf G6PDH activity. G6P in the cytosol could be  
462 converted to pentose phosphate and be imported into the plastid by the XPT transporter (Eicks *et*  
463 *al.*, 2002).

464 Oxidative stress might also stimulate the G6P shunt. Drought or high light can result in an  
465 accumulation of hydrogen peroxide and other ROS products (see Suzuki *et al.* (2011) for a  
466 review). Based on current findings, we propose that, with accumulation of hydrogen peroxide,

467 the  $K_m$  of G6PDH1 can decrease, increasing the flux through the G6P shunt. Sharkey & Weise  
468 (2016), proposed that the shunt can induce cyclic electron flow, which may help protect PSI.  
469 Photoprotective mechanisms of PSII, for example state transitions of the antenna complex or  
470 energy dependent quenching, are usually sufficient to safely dissipate excess excitation energy at  
471 PSII (Derks *et al.*, 2015). However, with high light, in fluctuating light (Allahverdiyeva *et al.*,  
472 2014), and at low temperature (Sonoike, 2011), excess energy or electrons could still be passed  
473 on to PSI and result in PSI photoinhibition. Unlike PSII, the proteins of PSI have a low turnover  
474 rate and damage to PSI is considered more severe (Scheller and Haldrup, 2005; Sonoike, 2011).  
475 Coupling ATP consumption in the G6P shunt with cyclic electron flow would dissipate light  
476 energy at PSI (Miyake *et al.*, 2004; Munekage *et al.*, 2004; Strand and Kramer, 2014).

## 477 **Conclusion**

478 Our data supports the conclusion that production and consumption of plastidic G6P is carefully  
479 regulated. Plastidic PGI activity is not adequate to bring F6P and G6P to equilibrium, preventing  
480 an accumulation of G6P, and G6PDH is partially deactivated reducing loss of carbon while still  
481 maintaining regulatory flexibility to increase and decrease the G6P shunt (Fig. 12) as needed.

## 482 **Supplementary data**

483 **Supplemental Fig. S1-** SDS page of the purified G6PDH and PGI proteins, stained with  
484 Coomassie blue.

485 **Supplemental Fig. S2-** Kinetics of plastidic and cytosolic AtPGI at different F6P and G6P  
486 concentrations.

487 **Supplemental Fig. S3-** Effect of 10 mM DTT on plastidic and cytosolic AtPGI

488 **Supplemental Fig. S4-** Hanes-Woolf plots of E4P and 6PG inhibition of plastidic AtPGI

489 **Supplemental Fig. S5-** Hanes-Woolf plots of NADPH effect on G6PDH1

## 490 **Acknowledgements**

491 We thank Michigan State University Research Technology Support Facility Mass Spectrometry  
492 Core for providing the facility for doing the LC-MS/MS work. This research was funded by U.S.  
493 Department of Energy Grant DE-FG02-91ER2002 (T.D.S. and A.L.P) and DE-FG02-  
494 11ER16220 (N.F.). A.L.P is partially supported by a fellowship from Michigan State University  
495 under the Training Program in Plant Biotechnology for Health and Sustainability (T32-  
496 GM110523). Partial salary support for T.D.S. came from Michigan AgBioResearch.

497 **Author Contributions**

498 A.L.P. designed and carried out the experiments and analyzed the data. A.B. designed and  
499 carried out the PGI experiments. N.F. did the calculations for the midpoint potential experiments.  
500 A.L.P. wrote the manuscript. T.D.S. supervised the project and edited the manuscript. All  
501 authors discussed the results and provided critical feedback.

## References

- Allahverdiyeva Y, Suorsa M, Tikkanen M, Aro E-M.** 2014. Photoprotection of photosystems in fluctuating light intensities. *Journal of Experimental Botany* **66**, 2427–2436.
- Anderson LE, Ng T-CL, Kyung-Eun Yoon P.** 1974. Inactivation of pea leaf chloroplastic and cytoplasmic glucose 6-phosphate dehydrogenases by light and dithiothreitol. *Plant Physiology* **53**, 835-839.
- Au SW, Grover S, Lam VM, Adams MJ.** 2000. Human glucose-6-phosphate dehydrogenase: the crystal structure reveals a structural NADP<sup>+</sup> molecule and provides insights into enzyme deficiency. *Structure* **8**, 293-303.
- Backhausen JE, Jöstingmeyer P, Scheibe R.** 1997. Competitive inhibition of spinach leaf phosphoglucose isomerase isoenzymes by erythrose 4-phosphate. *Plant Science* **130**, 121-131.
- Bassham JA, Krause GH.** 1969. Free energy changes and metabolic regulation in steady-state photosynthetic carbon reduction. *Biochimica et Biophysica Acta* **189**, 207-221.
- Brennan T, Anderson LE.** 1980. Inhibition by catalase of dark-mediated glucose-6-phosphate dehydrogenase activation in pea chloroplasts. *Plant Physiology* **66**, 815-817.
- Buchanan BB.** 1980. Role of light in the regulation of chloroplast enzymes. *Annual Review of Plant Physiology* **31**, 341-374.
- Buchanan BB, Gruissem W, Jones RL.** 2015. *Biochemistry & Molecular Biology of Plants*. Rockville: American Society of Plant Physiologists.
- Cammack R, Rao KK, Barger CP, Hutson KG, Andrew PW, Rogers LJ.** 1977. Midpoint redox potentials of plant and algal ferredoxins. *Biochemical Journal* **168**, 205-209.
- Cappellini MD, Fiorelli G.** 2008. Glucose-6-phosphate dehydrogenase deficiency. *Lancet* **371**, 64-74.
- Charrier JG, Anastasio C.** 2013. On dithiothreitol (DTT) as a measure of oxidative potential for ambient particles: evidence for the importance of soluble transition metals. *Atmospheric Chemistry and Physics* **12**, 11317-11350.
- Cho AK, Sioutas C, Miguel AH, Kumagai Y, Schmitz DA, Singh M, Eiguren-Fernandez A, Froines JR.** 2005. Redox activity of airborne particulate matter at different sites in the Los Angeles Basin. *Environmental Research* **99**, 40-47.

- Cushman JC, Tillett RL, Wood JA, Branco JM, Schlauch KA.** 2008. Large-scale mRNA expression profiling in the common ice plant, *Mesembryanthemum crystallinum*, performing C<sub>3</sub> photosynthesis and Crassulacean acid metabolism (CAM). *Journal of Experimental Botany* **59**, 1875-1894.
- Derks A, Schaven K, Bruce D.** 2015. Diverse mechanisms for photoprotection in photosynthesis. Dynamic regulation of photosystem II excitation in response to rapid environmental change. *Biochimica et Biophysica Acta Bioenergetics* **1847**, 468-485.
- Dietz KJ.** 1985. A possible rate limiting function of chloroplast hexosemonophosphate isomerase in starch synthesis of leaves. *Biochimica et Biophysica Acta* **839**, 240-248.
- Dyson BC, Allwood JW, Feil R, Xu YUN, Miller M, Bowsher CG, Goodacre R, Lunn JE, Johnson GN.** 2015. Acclimation of metabolism to light in *Arabidopsis thaliana*: the glucose 6-phosphate/phosphate translocator GPT2 directs metabolic acclimation. *Plant, Cell & Environment* **38**, 1404-1417.
- Dyson JED, Noltmann EA.** 1968. The effect of pH and temperature on the kinetic parameters of phosphoglucose isomerase. *The Journal of Biological Chemistry* **243**, 1401-1414.
- Eicks M, Maurino V, Knappe S, Flügge U-I, Fischer K.** 2002. The plastidic pentose phosphate translocator represents a link between the cytosolic and the plastidic pentose phosphate pathways in plants. *Plant Physiology* **128**, 512-522.
- Gerhardt R, Stitt M, Heldt HW.** 1987. Subcellular metabolite levels in spinach leaves. Regulation of sucrose synthesis during diurnal alterations in photosynthetic partitioning. *Plant Physiology* **83**, 399-407.
- Gray DW, Breneman SR, Topper LA, Sharkey TD.** 2011. Biochemical characterization and homology modeling of methyl butenol synthase and implications for understanding hemiterpene synthase evolution in plants. *Journal of Biological Chemistry* **286**, 20582-20590.
- Grazi E, De Flora A, Pontremoli S.** 1960. The inhibition of phosphoglucose isomerase by D-erythrose 4-phosphate. *Biochem Biophys Res Commun* **2**, 121-125.
- Hattenbach A, Heineke D.** 1999. On the role of chloroplastic phosphoglucomutase in the regulation of starch turnover. *Planta* **207**, 527-532.
- Heldt H-W, Piechulla B.** 2005. *Plant Biochemistry*. Burlington MA: Elsevier Academic Press.

**Heldt HW, Chon CJ, Maronde D, Herold A, Stankovic ZS, Walker DA, Kraminer A, Kirk MR, Heber U.** 1977. Role of orthophosphate and other factors in the regulation of starch formation in leaves and isolated chloroplasts. *Plant Physiology* **59**, 1146-1155.

**Hirasawa M, Brandes HK, Hartman FC, Knaff DB.** 1998. Oxidation-reduction properties of the regulatory site of spinach phosphoribulokinase. *Archives of Biochemistry and Biophysics* **350**, 127-131.

**Hirasawa M, Ruelland E, Schepens I, Issakidis-Bourguet E, Miginiac-Maslow M, Knaff DB.** 2000. Oxidation-reduction properties of the regulatory disulfides of sorghum chloroplast nicotinamide adenine dinucleotide phosphate-malate dehydrogenase. *Biochemistry* **39**, 3344-3350.

**Hirasawa M, Schürmann P, Jacquot JP, Manieri W, Jacquot P, Keryer E, Hartman FC, Knaff DB.** 1999. Oxidation-reduction properties of chloroplast thioredoxins, ferredoxin:thioredoxin reductase, and thioredoxin f-regulated enzymes. *Biochemistry* **38**, 5200-5205.

**Hutchison RS, Ort DR.** 1995. Measurement of equilibrium midpoint potentials of thiol/disulfide regulatory groups on thioredoxin activated chloroplast enzymes. *Methods in Enzymology* **252**, 220-228.

**Kammerer B, Fischer K, Hilpert B, Schubert S, Gutensohn M, Weber A, Flüge UI.** 1998. Molecular characterization of a carbon transporter in plastids from heterotrophic tissues: The glucose 6-phosphate phosphate antiporter. *The Plant Cell* **10**, 105-117.

**Knaff DB.** 2000. Oxidation-reduction properties of thioredoxins and thioredoxin-regulated enzymes. *Physiologia Plantarum* **110**, 309-313.

**Kruckeberg AL, Neuhaus HE, Feil R, Gottlieb LD, Stitt M.** 1989. Decreased-activity mutants of phosphoglucose isomerase in the cytosol and chloroplast of *Clarkia xantiana*. Impact on mass-action ratios and fluxes to sucrose and starch, and estimation of flux control coefficients and elasticity coefficients. *Biochemical Journal* **261**, 457-467.

**Kunz HH, Häusler RE, Fettke J, Herbst K, Niewiadomski P, Gierth M, Bell K, Steup M, Flüge UI, Schneider A.** 2010. The role of plastidial glucose-6-phosphate/phosphate translocators in vegetative tissues of *Arabidopsis thaliana* mutants impaired in starch biosynthesis. *Plant Biology* **12**, 115-128.



- Kunz HH, Zamani-Nour S, Hausler RE, Ludewig K, Schroeder JI, Malinova I, Fettke J, Flugge UI, Gierth M.** 2014. Loss of cytosolic phosphoglucose isomerase affects carbohydrate metabolism in leaves and is essential for fertility of Arabidopsis. *Plant Physiol* **166**, 753-765.
- Leakey ADB, Xu F, Gillespie KM, McGrath JM, Ainsworth EA, Ort DR.** 2009. Genomic basis for stimulated respiration by plants growing under elevated carbon dioxide. *Proceedings of the National Academy of Sciences* **106**, 3597-3602.
- Meyer T, Hölscher C, Schwöppe C, Von Schaewen A.** 2011. Alternative targeting of Arabidopsis plastidic glucose-6-phosphate dehydrogenase G6PD1 involves cysteine-dependent interaction with G6PD4 in the cytosol. *The Plant Journal* **66**, 745-758.
- Miyake C, Shinzaki Y, Miyata M, Tomizawa K.** 2004. Enhancement of cyclic electron flow around PSI at high light and its contribution to the induction of non-photochemical quenching of chl fluorescence in intact leaves of tobacco plants. *Plant and Cell Physiology* **45**, 1426-1433.
- Munekage Y, Hashimoto M, Miyake C, Tomizawa KI, Endo T, Tasaka M, Shikanai T.** 2004. Cyclic electron flow around photosystem I is essential for photosynthesis. *Nature* **429**, 579-582.
- Najjar VA.** 1948. The isolation and properties of phosphoglucomutase. *Journal of Biological Chemistry* **175**, 281-290.
- Née G, Zaffagnini M, Trost P, Issakidis-Bourguet E.** 2009. Redox regulation of chloroplastic glucose-6-phosphate dehydrogenase: A new role for f-type thioredoxin. *FEBS Letters* **583**, 2827-2832.
- Neuhaus HE, Schulte N.** 1996. Starch degradation in chloroplasts isolated from C<sub>3</sub> or CAM (crassulacean acid metabolism)-induced *Mesembryanthemum crystallinum* L. *Biochemical Journal* **318**, 945-953.
- Niewiadomski P, Knappe S, Geimer S, Fischer K, Schulz B, Unte US, Rosso MG, Ache P, Flugge UI, Schneider A.** 2005. The Arabidopsis plastidic glucose 6-phosphate/phosphate translocator GPT1 is essential for pollen maturation and embryo sac development. *The Plant Cell* **17**, 760-775.
- Olavarría K, Valdés D, Cabrera R.** 2012. The cofactor preference of glucose-6-phosphate dehydrogenase from *Escherichia coli* - modelling the physiological production of reduced cofactors. *FEBS J* **279**, 2296-2309.

- Ray WJ, Roscelli GA.** 1964. A kinetic study of the phosphoglucomutase pathway. *Journal of Biological Chemistry* **239**, 1228-1236.
- Salas M, Viñuela E, Sols A.** 1964. Spontaneous and enzymatically catalyzed anomerization of glucose 6-phosphate and anomeric specificity of related enzymes. *The Journal of Biological Chemistry* **240**, 561-568.
- Scheibe R, Geissler A, Fickenscher K.** 1989. Chloroplast glucose-6-phosphate dehydrogenase:  $K_m$  shift upon light modulation and reduction. *Archives of Biochemistry and Biophysics* **274**, 290-297.
- Scheller HV, Haldrup A.** 2005. Photoinhibition of photosystem I. *Planta* **221**, 5-8.
- Schleucher J, Vanderveer P, Markley JL, Sharkey TD.** 1999. Intramolecular deuterium distributions reveal disequilibrium of chloroplast phosphoglucose isomerase. *Plant, Cell & Environment* **22**, 525-533.
- Schnarrenberger C, Flechner A, Martin W.** 1995. Enzymatic evidence for a complete oxidative pentose phosphate pathway in chloroplasts and an incomplete pathway in the cytosol of spinach leaves. *Plant Physiology* **108**, 609-614.
- Schnarrenberger C, Oeser A.** 1974. Two isoenzymes of glucosephosphate isomerase from spinach leaves and their intracellular compartmentation. *European Journal of Biochemistry* **45**, 77-82.
- Schnarrenberger C, Oeser A, Tolbert NE.** 1973. Two enzymes each of glucose-6-phosphate dehydrogenase and 6-phosphogluconate dehydrogenase in spinach leaves. *Archives of Biochemistry and Biophysics* **154**, 438-448.
- Semenikhina AV, Popova A, Matasova LV.** 1999. Catalytic properties of glucose-6-phosphate dehydrogenase from pea leaves. *Biochemistry* **64**, 863-866.
- Sharkey TD, Vassey TL.** 1989. Low oxygen inhibition of photosynthesis is caused by inhibition of starch synthesis. *Plant Physiology* **90**, 385-387.
- Sharkey TD, Weise SE.** 2016. The glucose 6-phosphate shunt around the Calvin-Benson Cycle. *Journal of Experimental Botany* **67**, 4067-4077.
- Shreve DS, Levy HR.** 1980. Kinetic mechanism of glucose-6-phosphate dehydrogenase from the lactating rat mammary gland. *Journal of Biological Chemistry* **255**, 2670-2677.
- Sonoike K.** 2011. Photoinhibition of photosystem I. *Physiologia Plantarum* **142**, 56-64.

- Strand DD, Fisher N, Davis GA, Kramer D.** 2016. Redox regulation of the antimycin A sensitive pathway of cyclic electron flow around photosystem I in higher plant thylakoids. *Biochimica et Biophysica Acta Bioenergetics* **1857**, 1-6.
- Strand DD, Kramer D.** 2014. Control of non-photochemical exciton quenching by the proton circuit of photosynthesis. In: Demmig-Adams B, Garab G, Adams Iii WW, Govindjee, eds. *Non-photochemical quenching and energy dissipation in plants, algae and cyanobacteria*, Vol. 40: Springer, 387-408.
- Suzuki N, Koussevitzky S, Mittler R, Miller G.** 2011. ROS and redox signalling in the response of plants to abiotic stress. *Plant Cell and Environment* **35**, 259-270.
- Szecowka M, Heise R, Tohge T, Nunes-Nesi A, Vosloh D, Huege J, Feil R, Lunn J, Nikoloski Z, Stitt M, Fernie AR, Arrivault S.** 2013. Metabolic fluxes in an illuminated Arabidopsis rosette. *The Plant Cell Online* **25**, 694-714.
- Uematsu K, Suzuki N, Iwamae T, Inui M, Yukawa H.** 2012. Expression of Arabidopsis plastidial phosphoglucomutase in tobacco stimulates photosynthetic carbon flow into starch synthesis. *Journal of Plant Physiology* **169**, 1454-1462.
- Wakao S, Benning C.** 2005. Genome-wide analysis of glucose-6-phosphate dehydrogenases in Arabidopsis. *The Plant Journal* **41**, 243-256.
- Weise SE, Weber A, Sharkey TD.** 2004. Maltose is the major form of carbon exported from the chloroplast at night. *Planta* **218**, 474-482.
- Wenderoth I, Scheibe R, von Schaewen A.** 1997. Identification of the cysteine residues involved in redox modification of plant plastidic glucose-6-phosphate dehydrogenase. *Journal of Biological Chemistry* **272**, 26985-26990.
- Wendt UK, Wenderoth I, Tegeler A, von Schaewen A.** 2000. Molecular characterization of a novel glucose-6-phosphate dehydrogenase from potato (*Solanum tuberosum* L.). *The Plant Journal* **23**, 723-733.
- Wintermans JGFM, DeMots A.** 1965. Spectrophotometric characteristics of chlorophylls a and b and their pheophytins in ethanol. *Biochimica et Biophysica Acta* **109**, 448-453.
- Wright DP, Huppe HC, Turpin DH.** 1997. In vivo and in vitro studies of glucose-6-phosphate dehydrogenase from barley root plastids in relation to reductant supply for NO<sub>2</sub><sup>-</sup> assimilation. *Plant Physiology* **114**, 1413-1419.

**Yu TS, Lue WL, Wang SM, Chen J.** 2000. Mutation of Arabidopsis plastid phosphoglucose isomerase affects leaf starch synthesis and floral initiation. *Plant Physiology* **123**, 319-326.

|                             | F6P → G6P     |               | G6P → F6P     |               |
|-----------------------------|---------------|---------------|---------------|---------------|
|                             | Plastidic PGI | Cytosolic PGI | Plastidic PGI | Cytosolic PGI |
| $K_m$ ( $\mu\text{M}$ )     | $73 \pm 46$   | $203 \pm 7$   | $164 \pm 25$  | $158 \pm 49$  |
| E4P $K_i$ ( $\mu\text{M}$ ) | 2.3           | 1.5           | 6.0           | 3.7           |
| 6PG $K_i$ ( $\mu\text{M}$ ) | 31            | 106           | 245           | 44            |

**Table 1.** Kinetic constants and inhibition constants for plastidic and cytosolic AtPGI as determined by NADPH-linked spectrophotometric assays and LC-MS/MS assays. Each number was determined from the fitted curve as described in the methods.

|                              | G6PDH1 | G6PDH2 | G6PDH3 |
|------------------------------|--------|--------|--------|
| G6P $K_m$ (mM)               | 0.3    | 10.3   | 0.3    |
| G6P $K_i$ (mM)               | 18.9   | 30.0   | 37.0   |
| NADP $K_m$ ( $\mu$ M)        | 0.7    | 1.3    | 0.6    |
| $k_{cat}$ ( $s^{-1}$ )       | 57.0   | 39.4   | 14.6   |
| Catalytic Efficiency         |        |        |        |
| G6P ( $mM^{-1} s^{-1}$ )     | 190.0  | 3.8    | 48.7   |
| Catalytic Efficiency         |        |        |        |
| NADP ( $\mu M^{-1} s^{-1}$ ) | 81.4   | 30.3   | 29.2   |
| NADPH $K_i$ ( $\mu$ M)       | 59     | 0.9    | 112    |

**Table 2.** Kinetic constants and inhibition constants of AtG6PDH1, 2, and 3 as determined by NADPH-linked spectrophotometric assays. Each number was determined from by a modified Michaelis-Menten equation which includes substrate inhibition. Data points used in model fitting were n=3 different preparations. For inhibition constants, each number was determined from the fitted curves as described in the methods.

|          |                        | G6PDH1 | G6PDH2 | G6PDH3 |
|----------|------------------------|--------|--------|--------|
| Oxidized | G6P $K_m$ (mM)         | 0.3    | 10.3   | 0.3    |
|          | $k_{cat}$ ( $s^{-1}$ ) | 57.0   | 39.4   | 14.6   |
| Reduced  | G6P $K_m$ (mM)         | 3.4    | 8.6    | 0.6    |
|          | $k_{cat}$ ( $s^{-1}$ ) | 52.2   | 20.4   | 11.0   |

**Table 3.** Kinetic constants of oxidized and reduced AtG6PDH1, 2, and 3 determined by NADPH-linked spectrophotometric assays. Each number was determined from by a modified Michalis-Menten equation which includes substrate inhibition. Data points used in model fitting were n=3 different preparations.



---

| Enzyme or metabolite | Midpoint potential, $E_m$ (mv)<br>at pH 8 | % reduced at -378 mV |
|----------------------|-------------------------------------------|----------------------|
| G6PDH                | -378                                      | 50.0                 |
| Ferredoxin           | -410                                      | 7.0                  |
| NADPH                | -380                                      | 46.0                 |
| Thioredoxin <i>f</i> | -350                                      | 90.6                 |
| Thioredoxin <i>m</i> | -360                                      | 81.1                 |
| NADP-MDH             | -390                                      | 27.5                 |
| FBPase               | -375                                      | 56.0                 |
| PRK                  | -355                                      | 86.5                 |
| Cyclic electron flow | -330                                      | 98.0                 |

---

**Table 4. Midpoint potentials and percent reduction of key Calvin-Benson cycle enzymes and electron transport proteins at -378 mV at pH 8, assuming equilibrium.** Calvin-Benson cycle enzymes are mostly active at the midpoint potential of G6PDH. One electron chemistry is assumed for ferredoxin and two electron chemistry for all others.

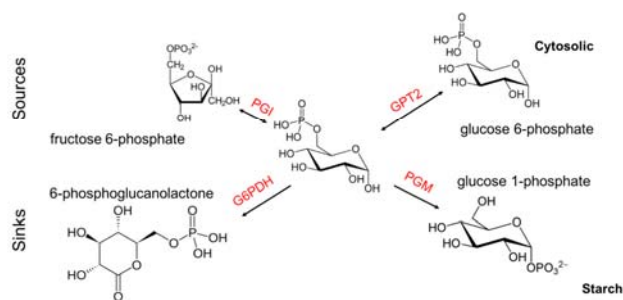

**Fig 1. Production and consumption of plastidic G6P.** Plastidic G6P can be produced by PGI isomerization of F6P, transported across the plastidic membrane by GPT2, consumed by PGM for starch synthesis, or consumed by G6PDH to enter the G6P shunt.

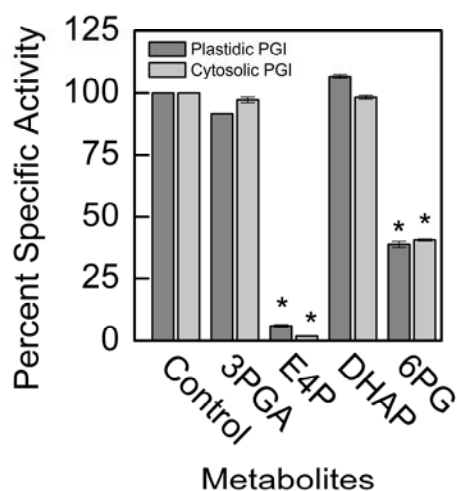

**Fig 2. Comparison of specific activity of plastidic (a and b) and cytosolic (c and d) AtPGI with various metabolites** Each bar represents mean and error bars represent S.E. (n=3). All metabolites were screened at 1:1 F6P substrate to metabolite. Data with an asterisk (\*) are significantly different from the control as determined by Student's t-test ( $P < 0.05$ ).

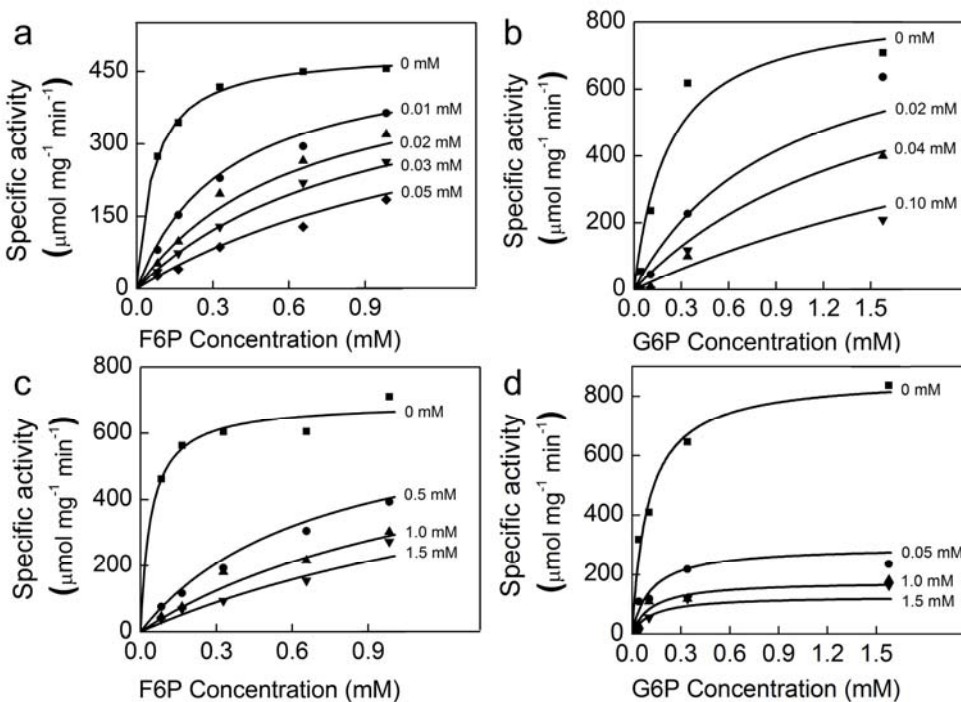

**Fig 3. Effect of E4P (a, b) and 6PG (c, d) on plastidic AtPGI.** Different symbols represent different concentrations of inhibitor. PGI was more inhibited by E4P than by 6PG. Lines represent data fit to Eq. 3.

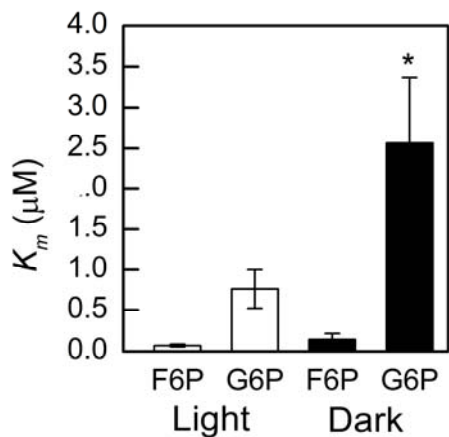

**Fig 4. Comparison of G6P and F6P  $K_m$  in plastidic SoPGI in dark and light-treated isolated spinach chloroplasts.** Each bar represents mean and error bars represent S.E. (n=3). The  $K_m$  for G6P increased in dark treated compared to light treated isolated chloroplasts. Bars with a cross (+) are significantly different from corresponding light treated samples as determined by Student's t-test ( $P < 0.1$ ).

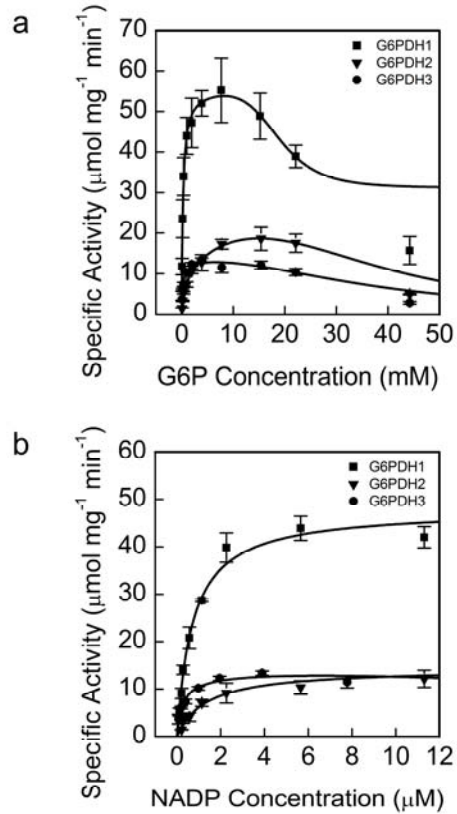

**Fig 5. Kinetics of AtG6PDH1, 2, and 3 at different G6P (a) and NADP<sup>+</sup> (b) concentrations.**

Each data point represents mean and error bars represent S.E. ( $n=3$ ). All three isoforms of oxidized G6PDH showed substrate inhibition for G6P. G6PDH1 and 3 showed the greatest affinity for G6P and G6PDH3 had the greatest affinity for NADP<sup>+</sup>. During the G6P experiments NADP<sup>+</sup> was 0.6 mM and during the NADP<sup>+</sup> experiment G6P concentration was 7 mM for G6PDH1 and 3 and 15 mM for G6PDH2. In (a) lines represent data fit to Eq. 2 and in (b) lines represent data fit to the Michaelis-Menten equation.

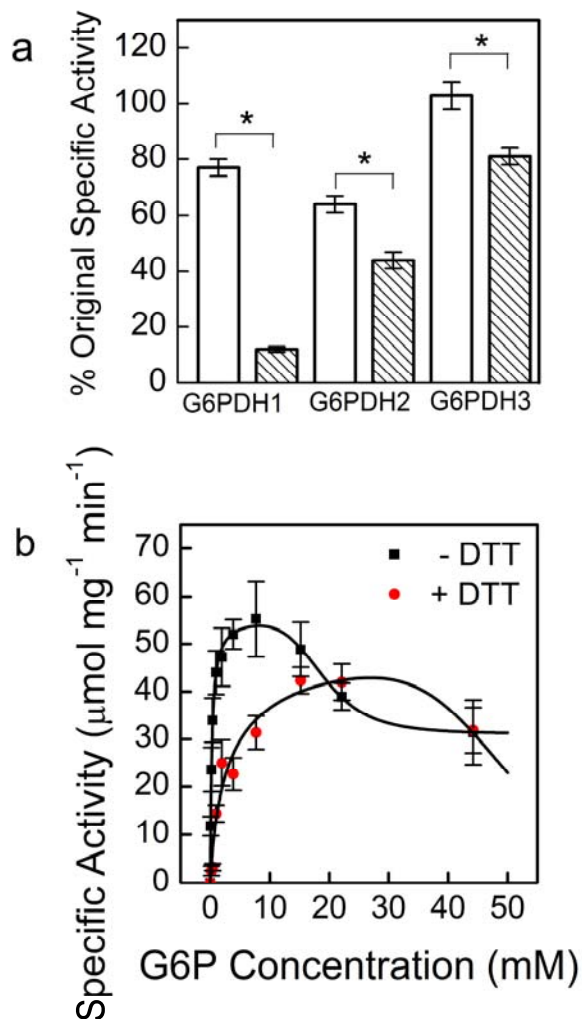

**Fig 6. Activity of AtG6PDH 1, 2, and 3 with and without DTT treatment (a) and  $K_m$  shift with DTT in G6PDH 1 (b).** Each bar or data point represents mean and error bars represent S.E. ( $n=3$ ). G6PDH1 was the most affected by DTT treatment. White bars indicate controls incubated without DTT for 30 minutes and shaded bars represent incubation with 10 mM DTT for 30 minutes. Assays were done with 5 mM G6P for G6PDH1 and G6PDH3, and 15 mM for G6PDH2. The lines represent data fit to Eq. 2. Bars with an asterisk (\*) are significantly different from corresponding controls as determined by Student's t-test ( $P < 0.05$ ).

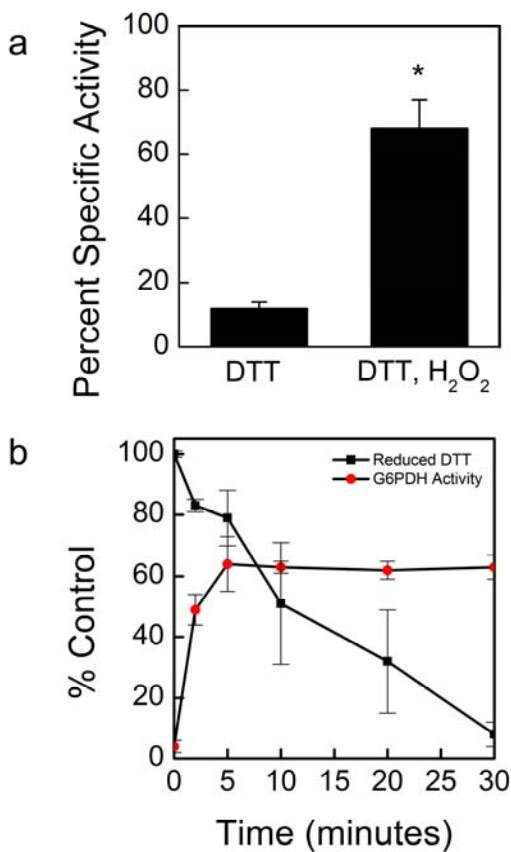

**Fig 7. Activation of DTT-deactivated AtG6PDH1 with hydrogen peroxide treatment.**

G6PDH1 deactivation by DTT could be recovered by addition of equimolar hydrogen peroxide.

(a). Reactivation is not through DTT oxidation, but rather hydrogen peroxide directly effects G6PDH1

(b). Assays were done with 5 mM G6P. Each bar or data point represents mean and error bars represent S.E. (n=3).

Bars with an asterisk (\*) are significantly different as determined by two tailed Student's t-test (P < 0.05).

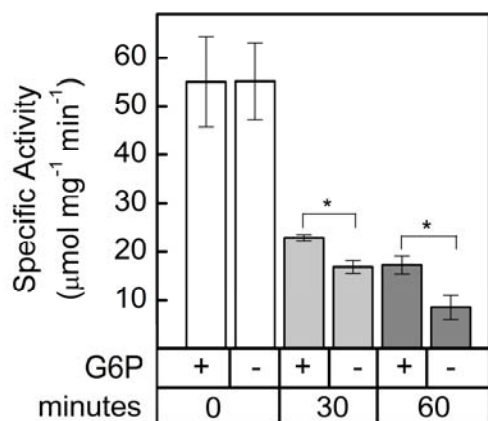

**Fig 8. AtG6PDH1 protection from deactivation by G6P.** G6PDH1 is less deactivated by DTT after 30 and 60 min when G6P is present at 5 mM. Each bar represents the mean and error bars represent S.E. (n=3). Bars with asterisk (\*) are significantly different as determined by two tailed Student's t-test ( $P < 0.05$ ).

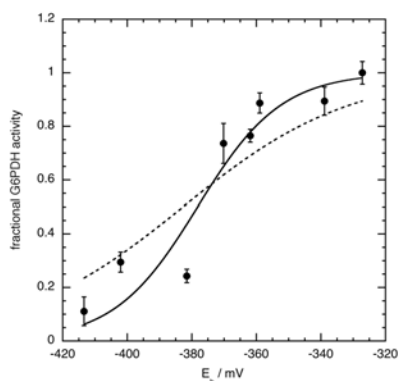

**Fig 9. AtG6PDH1 midpoint potential.** The midpoint potential of G6PDH1 was determined to be -378 mV at pH 8. Assays were done at the  $K_m$  concentration of G6P for oxidized G6PDH1, 0.3 mM. Each data point represents the mean and error bars represent S.E. (n=3). The dashed line represents the Nernst equation for one electron. The solid line represents the Nernst equation for two electrons.



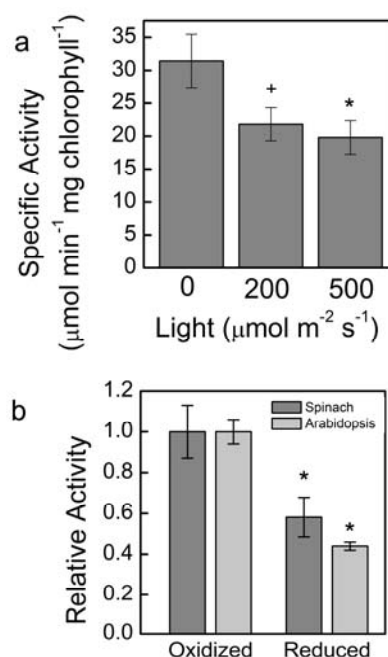

**Fig 10. Whole leaf and chloroplast activity of G6PDH in Arabidopsis, and spinach.** Whole leaf activity of AtG6PDH decreased 35% after illumination (a). This represents the total redox sensitive G6PDH fraction in Arabidopsis leaves. Chloroplast G6PDH activity decreased 50% after reduction by DTT (b). Samples were normalized by  $\mu\text{mol min}^{-1}$  of activity per mg of chlorophyll added to the assay mixture. Assays were done with 5 mM G6P. Each bar represents the mean and error bars represent S.E. (n=3). Bars with a plus sign (+) are significantly different as determined by two tailed Student's t-test ( $P < 0.1$ ). One asterisk (\*) signifies statistical difference as determined by two tailed Student's t-test ( $P < 0.05$ )

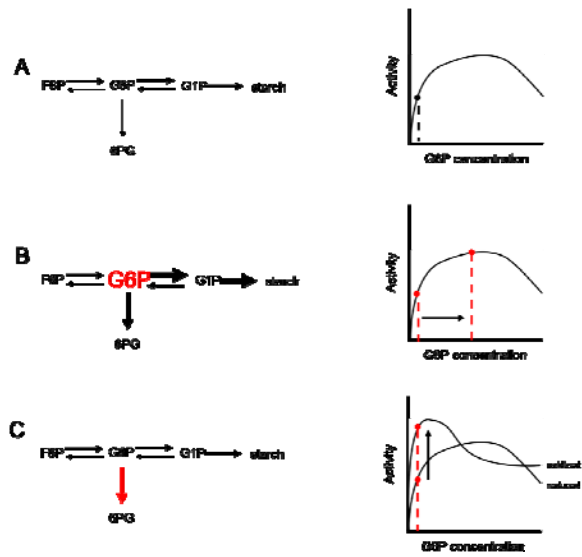

**Fig 11. Model of production and consumption of glucose 6-phosphate in the chloroplast stroma through the G6P shunt.** Under normal conditions, there may be flux through the G6P shunt as well as flux to starch synthesis (a). Flux through the G6P shunt can be modulated either by an increase in G6P substrate (b) or an increase in G6PDH activity (c). Arrows represent activity of enzymes and changes in thickness represent relative changes in flux. Red represents changes in the steady-state conditions.

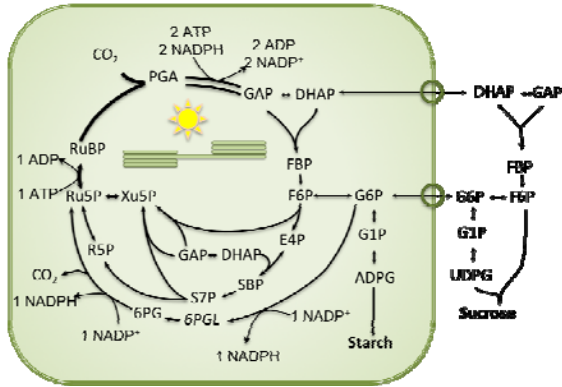

**Fig 12. The glucose 6-phosphate shunt.** G6PDH is consumed by G6PDH to enter the G6PDH shunt. G6P re-enters the Calvin-Benson cycle as Ru5P. Overall, the shunt consumes three ATP and two NADPH<sup>+</sup> and produces two NADPH. One CO<sub>2</sub> molecule is lost for every G6P that enters the shunt.
